# Supplementary material
Source: Royal Society of Chemistry journal article supplement (doi:10.1039/d6ta00863a)
Supplement: d6ta00863a1.pdf [file d6ta00863a1.pdf]

## Supporting Information

### **Benzotriazole Loading in Confined ZIF-8@mSiO<sub>2</sub> Nanospaces for Waterborne Anticorrosion Coatings**

Kwang Keat Leong<sup>a</sup>, Minjun Kim<sup>a\*</sup>, Asep Sugih Nugraha<sup>a</sup>, Jeffrey Venezuela<sup>b</sup>, Yusuf Valentino Kaneti<sup>a</sup>, Muxina Konarova<sup>c</sup>, Yusuke Yamauchi<sup>a,d\*</sup>, Yuan Ma<sup>c</sup>, Nasim Amiralian<sup>a\*</sup>

<sup>a</sup> Australian Institute for Bioengineering and Nanotechnology (AIBN), The University of Queensland, Brisbane, Queensland 4071, Australia

<sup>b</sup> School of Mechanical and Mining Engineering, Faculty of Engineering, Architecture and Information Technology, The University of Queensland, Brisbane, Queensland 4071, Australia

<sup>c</sup> School of Chemical Engineering, The University of Queensland, Brisbane, Queensland 4071, Australia

<sup>d</sup> Department of Materials Process Engineering, Graduate School of Engineering, Nagoya University, Nagoya 464-8603, Japan

<sup>e</sup> Baoshan Iron & Steel Co., Ltd., Shanghai 201900, China

**E-mails:** n.amiralian@uq.edu.au (N.A.); y.yamauchi@uq.edu.au (Y.Y); minjun.kim@uq.edu.au (M.K.)

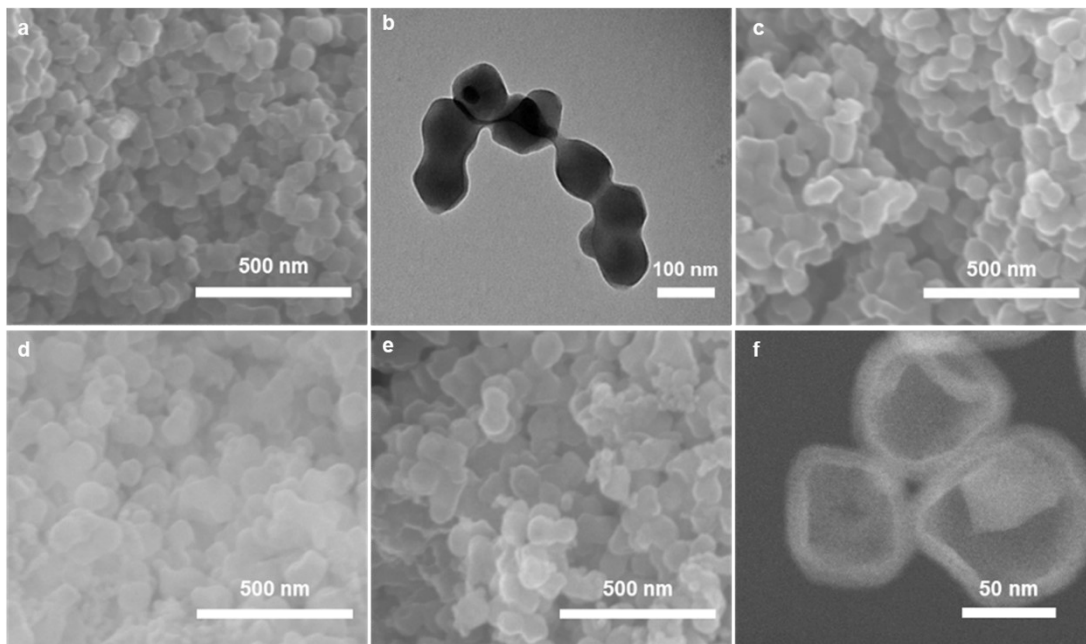

**Figure S1.** SEM image of (a) ZIF-8, TEM image (b) of BTA-ZIF-8. SEM image of (c) BTA-ZIF-8, (d) ZIF-8@mSiO<sub>2</sub>, and (e) BTA-ZIF-8@mSiO<sub>2</sub>. (f) HAADF-STEM image of the etched BTA-ZIF-8@mSiO<sub>2</sub>.

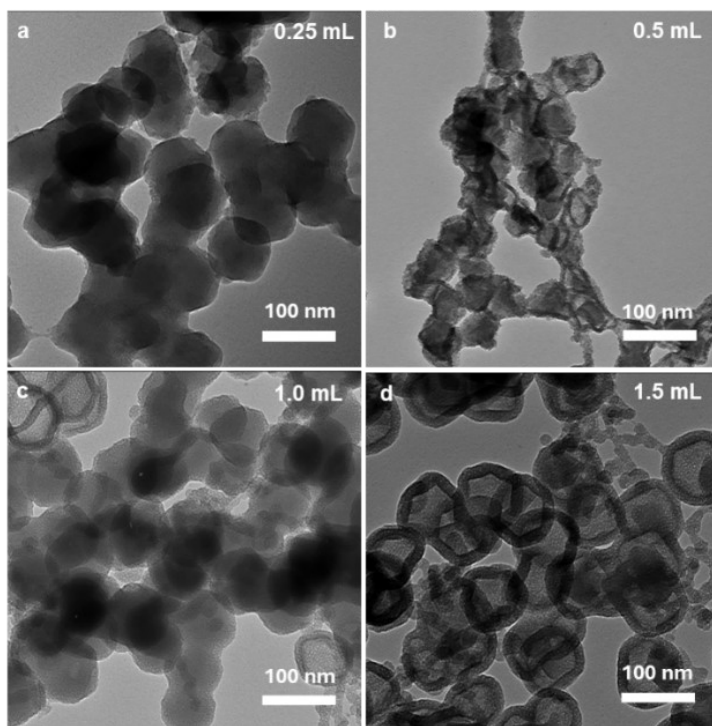

**Figure S2.** TEM images of ZIF-8@mSiO<sub>2</sub> synthesized using (a) 0.25 mL, (b) 0.5 mL, (c) 1.0 mL, and (d) 1.5 mL of 68.6 mM CTAB solution.

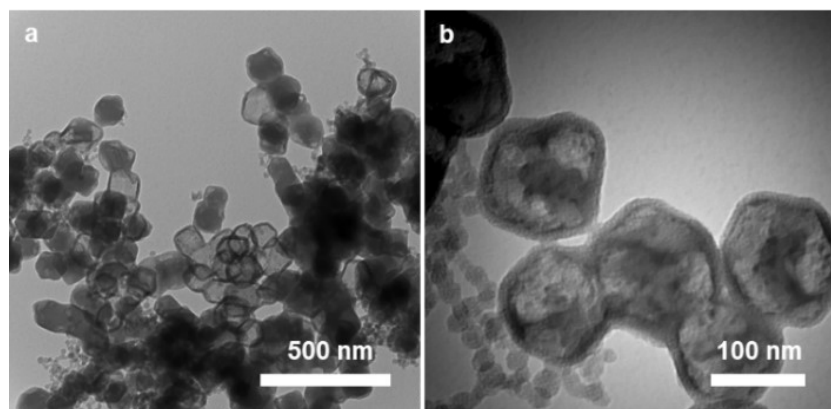

**Figure S3.** (a) Low-magnification and (b) high-magnification TEM images of the product obtained from coating ZIF-8 with mSiO<sub>2</sub> under water-based conditions.

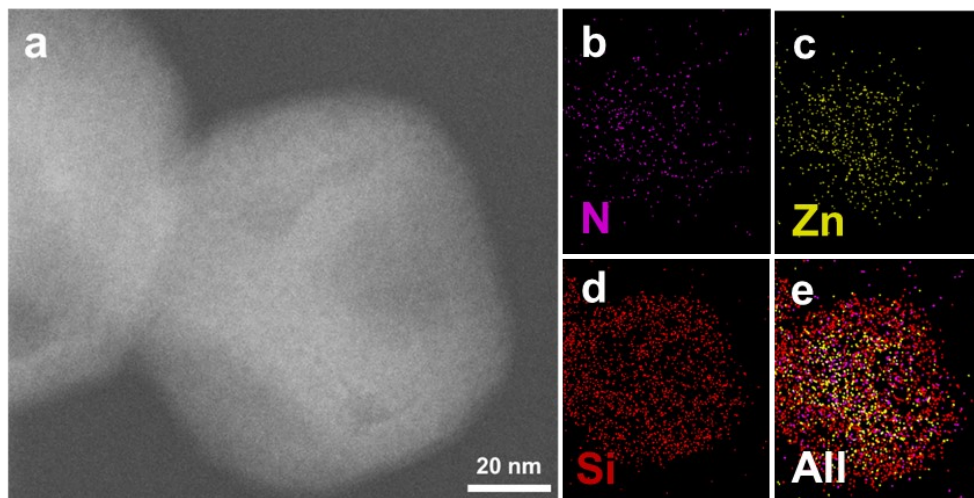

**Figure S4.** (a) HRTEM image of BTA-ZIF-8@mSiO<sub>2</sub> and respective elemental mappings for (b) N, (c) Zn, (d) Si, and (e) all.

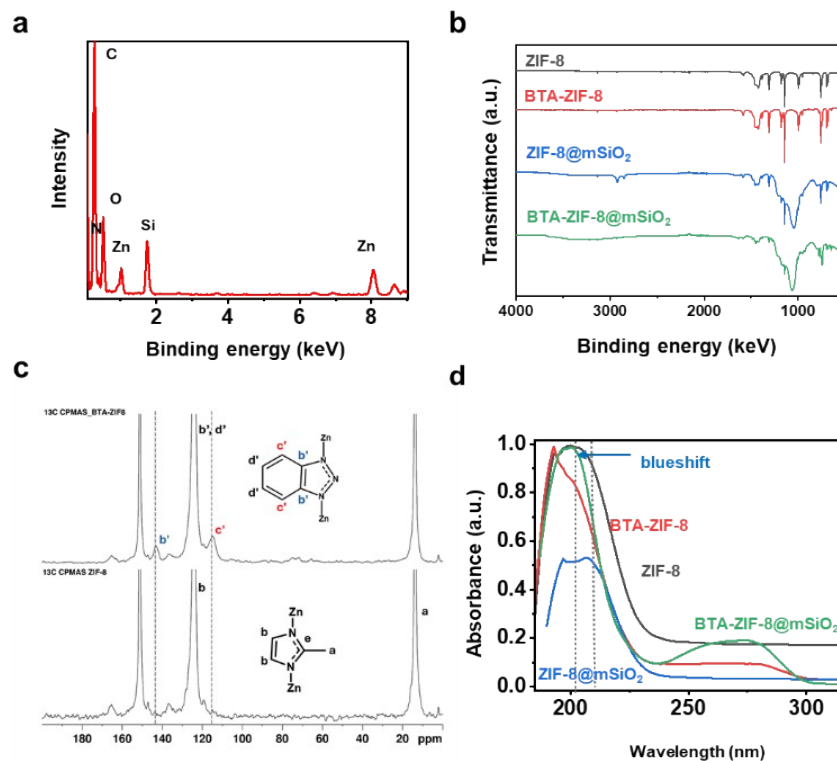

**Figure S5.** (a) EDS spectra obtained from HR-TEM mapping of BTA-ZIF-8@mSiO<sub>2</sub>, confirming the presence of all constituent elements. (b) FTIR spectra of all nanoparticles. (c) <sup>13</sup>C CP-MAS NMR of BTA-ZIF-8 (top) and ZIF-8 (bottom). (d) UV-Vis spectra for the nanoparticles in water showing a blue shift after loading with BTA.

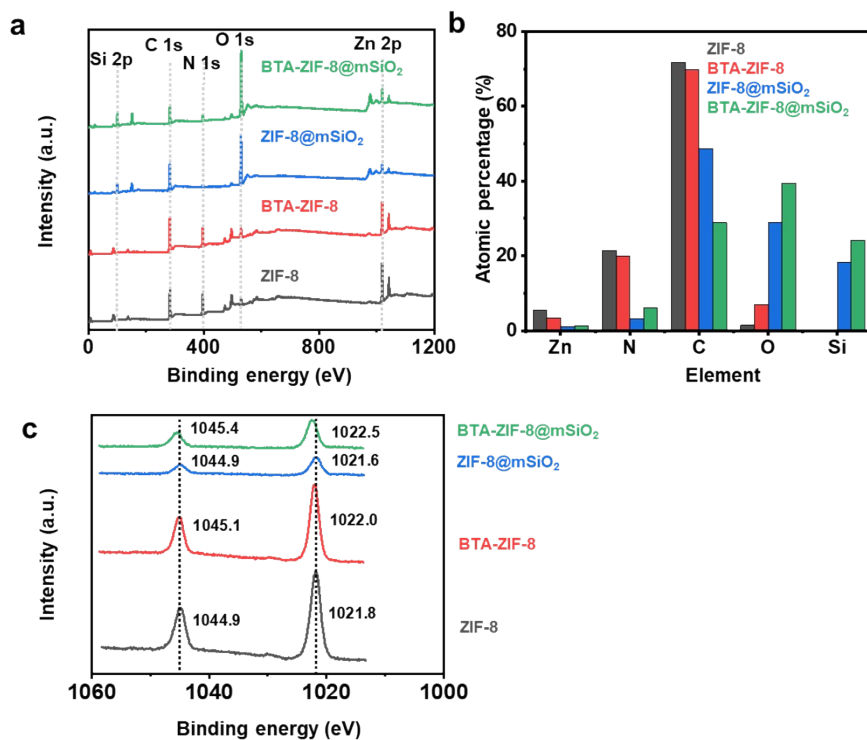

**Figure S6.** (a) Survey XPS spectra of ZIF-8, BTA-ZIF-8, ZIF-8@mSiO<sub>2</sub> and BTA-ZIF-8@mSiO<sub>2</sub>. (b) Bar graph of atomic% of Zn, N, C, O and Si. (c) High-resolution XPS spectra for Zn 2p.

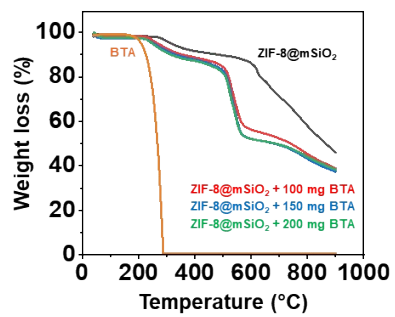

**Figure S7.** TGA curves of BTA-ZIF-8@mSiO<sub>2</sub> prepared with different initial loading amounts of BTA.

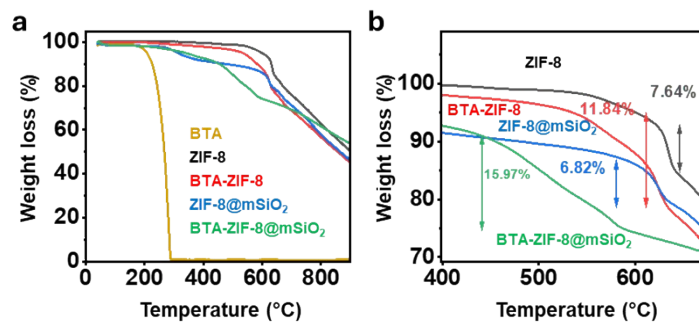

**Figure S8.** (a) TGA curves of BTA, ZIF-8, and various ZIF-8-based nanoparticles. (b) Enlarged view of the corresponding temperature range.

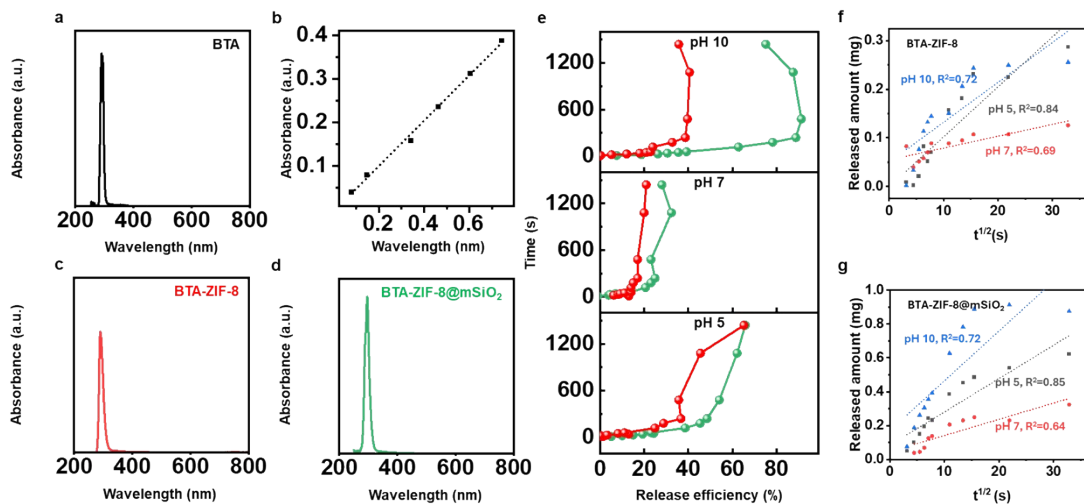

**Figure S9.** (a) UV-Vis absorbance of BTA. (b) Calibration curve used to quantify the released amount of BTA. Absorbance of (c) BTA-ZIF-8 and (d) BTA-ZIF-8@mSiO<sub>2</sub>. (e) Time-dependent release efficiency at different pH values for BTA-ZIF-8 and BTA-ZIF-8@mSiO<sub>2</sub>. Fitting of the release curve using Higuchi model for (f) BTA-ZIF-8 and (g) BTA-ZIF-8@mSiO<sub>2</sub>.

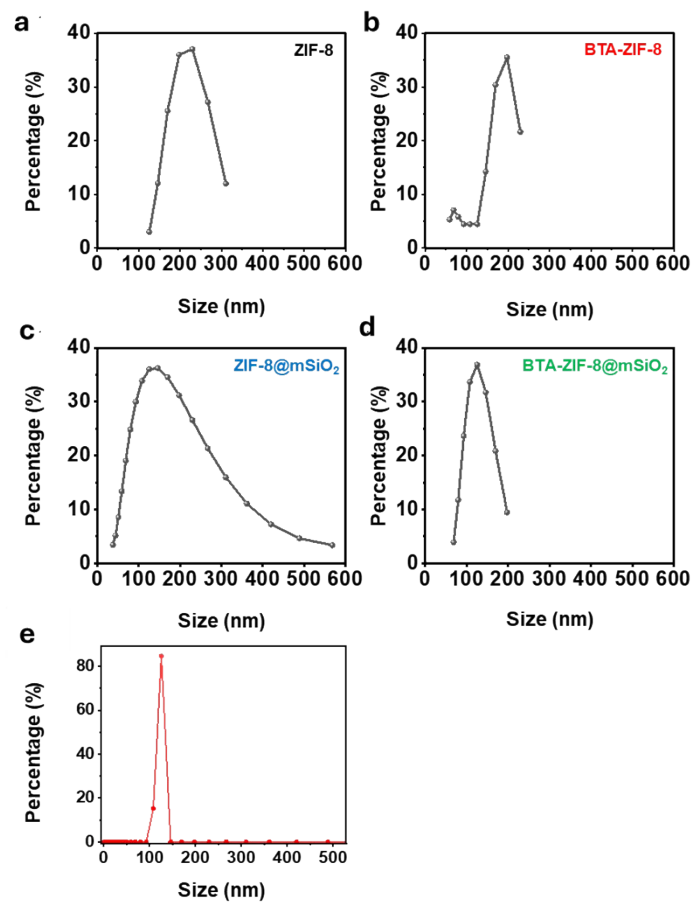

**Figure S10.** DLS particle size analysis for (a) ZIF-8, (b) BTA-ZIF-8, (c) ZIF-8@mSiO<sub>2</sub>, and (d) BTA-ZIF-8@mSiO<sub>2</sub>. (e) DLS particle size distribution of BTA-ZIF-8@mSiO<sub>2</sub> after 6 months of water immersion.

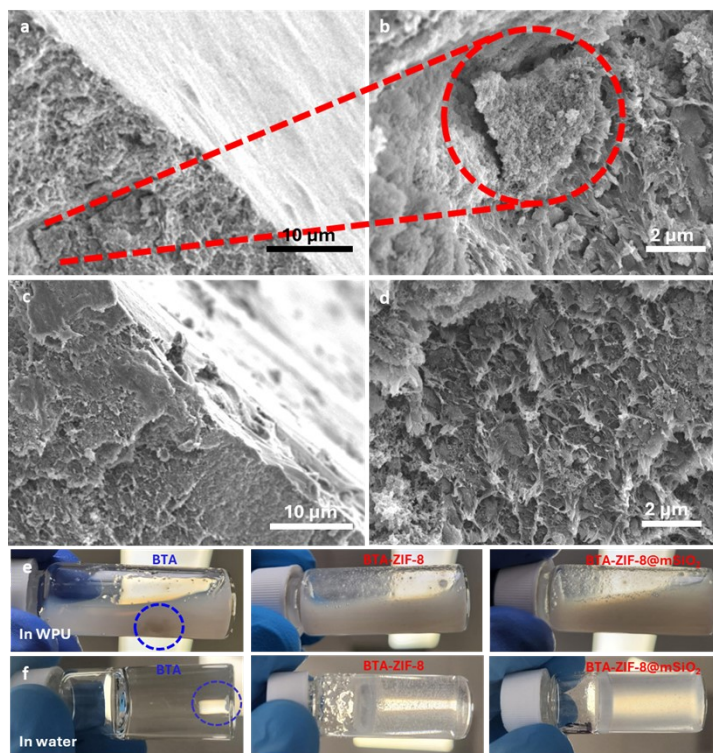

**Figure S11.** Cross-sectional SEM images for BTA-ZIF-8/WPU (a-b) and BTA-ZIF-8@mSiO<sub>2</sub>/WPU (c-d) films. Dispersion tests of BTA, BTA-ZIF-8 and BTA-ZIF-8@mSiO<sub>2</sub> in waterborne polyurethane (e) and water (f).

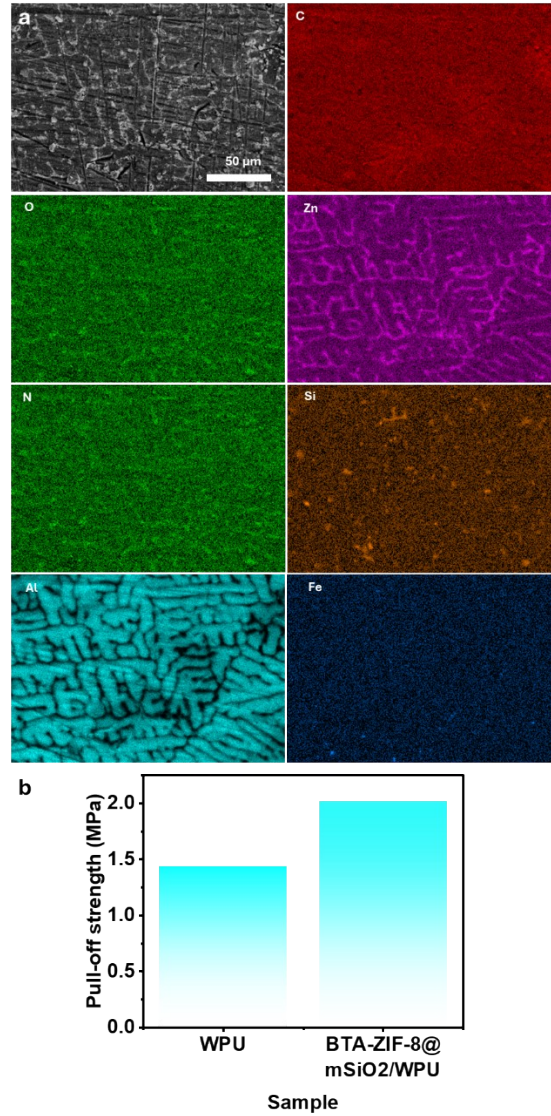

**Figure S12.** (a) EDS mapping images of BTA-ZIF-8@mSiO<sub>2</sub>/WPU coating on Zn-plated steel.

(b) Pull-off adhesion strength for WPU and BTA-ZIF-8@mSiO<sub>2</sub>/WPU.

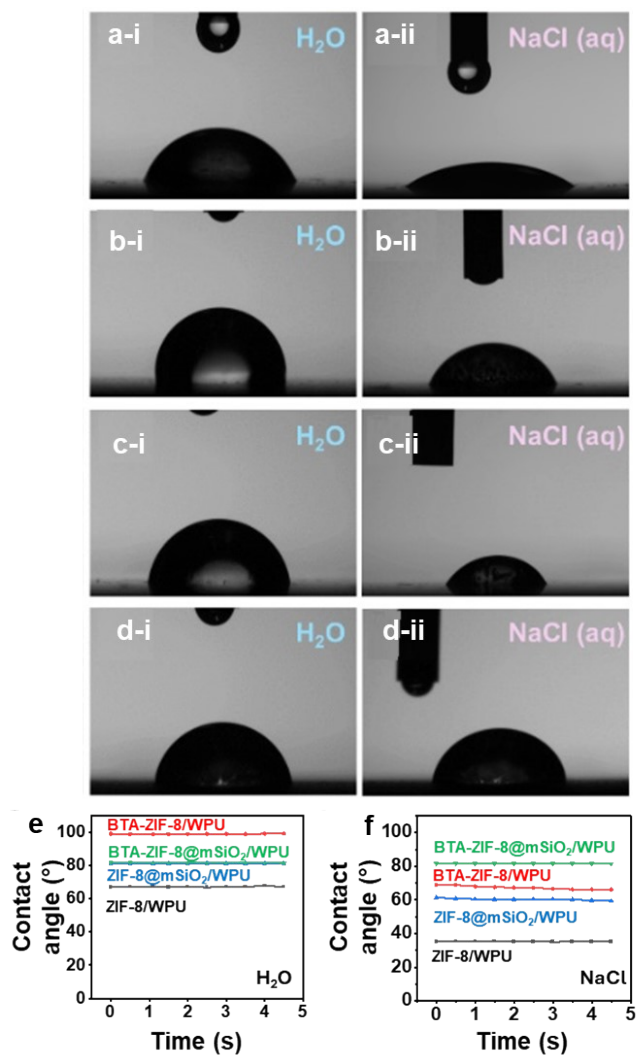

**Figure S13.** Contact angle images and corresponding measured values of the WPU film loaded with 3 wt.% of (a) ZIF-8, (b) BTA-ZIF-8, (c) ZIF-8@mSiO<sub>2</sub>, and (d) BTA-ZIF-8@mSiO<sub>2</sub>, tested with (i) water and (ii) 3.5 wt.% NaCl solution. The summarized contact angle values are shown in (e) for water and (f) for NaCl solution.

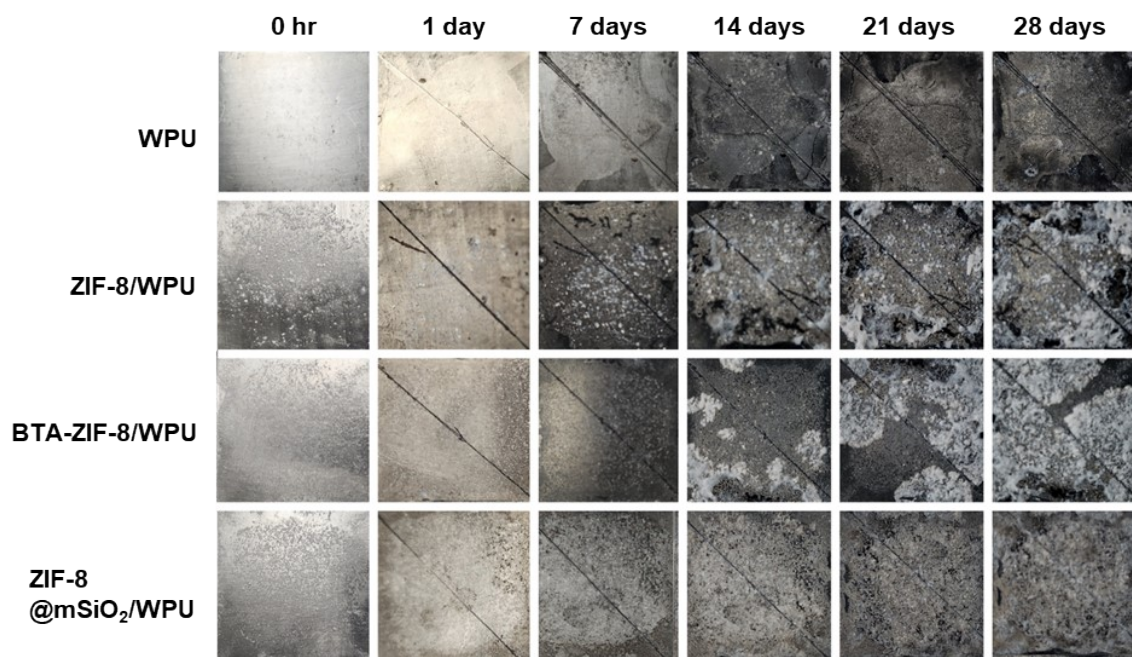

**Figure S14.** Images of steel plates coated with different coating compositions during the immersion test in 3.5 wt.% NaCl solution.

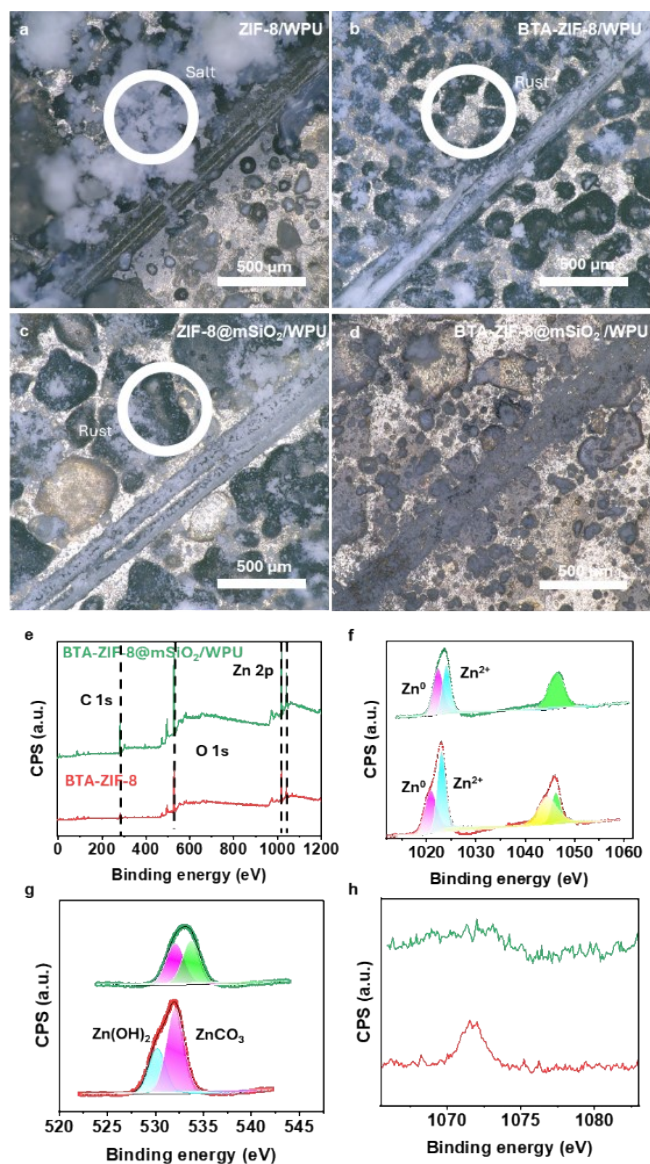

**Figure S15.** Optical microscopy images of post-immersion WPU coatings on steel plates containing 3 wt.% of (a) ZIF-8, (b) BTA-ZIF-8, (c) ZIF-8@mSiO<sub>2</sub>, and (d) BTA-ZIF-8@mSiO<sub>2</sub>. (e) The survey XPS spectra for BTA-ZIF-8@mSiO<sub>2</sub>/WPU (green) and BTA-ZIF-8/WPU (red). High-resolution XPS for Zn 2*p* (f), O 1*s* (g), and Na 1*s* (h) for BTA-ZIF-8@mSiO<sub>2</sub>/WPU (green) and BTA-ZIF-8/WPU (red).

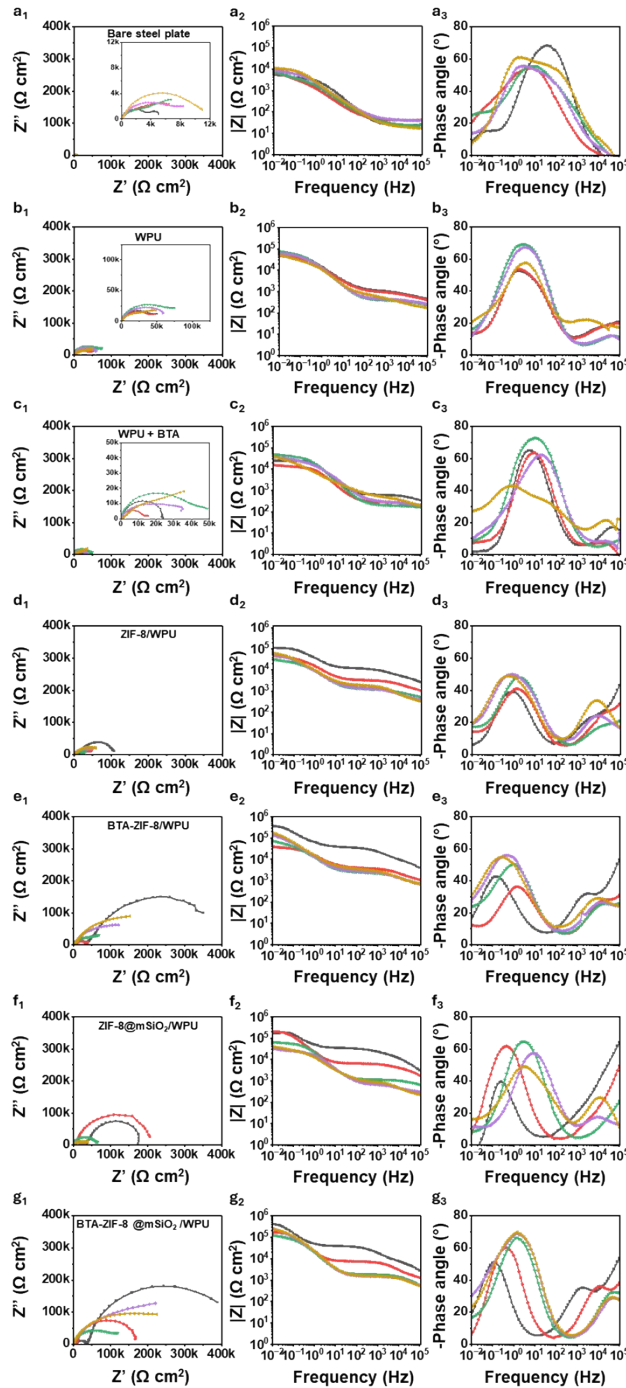

**Figure S16.** Impedance study of different coatings using 1) Nyquist plots, (2) Bode plots, and (3) phase angle plots for (a) bare steel plate, (b) WPU, (c) WPU + BTA, (d) ZIF-8/WPU, (e) BTA-ZIF-8/WPU, (f) ZIF-8@mSiO<sub>2</sub>/WPU, and (g) BTA-ZIF-8@mSiO<sub>2</sub>/WPU for day 0 (black), day 1 (red), week 1 (green), week 2 (purple) and week 3 (light yellow).

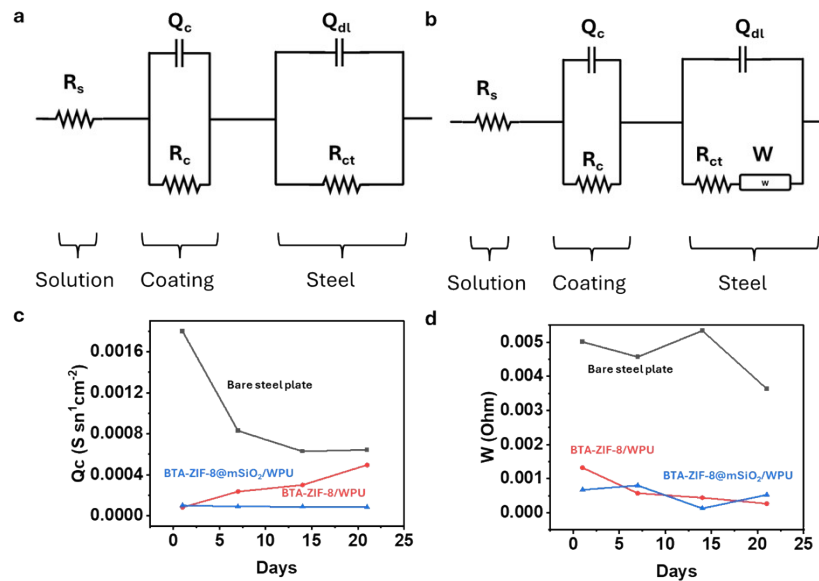

**Figure S17.** Equivalent circuit models used for fitting: (a) coating at day 0 and (b) coating from day 1 onwards. Equivalent circuit parameter evolution over time for coating capacitance ( $Q_c$ ) (c) and Warburg element ( $W$ ) (d).

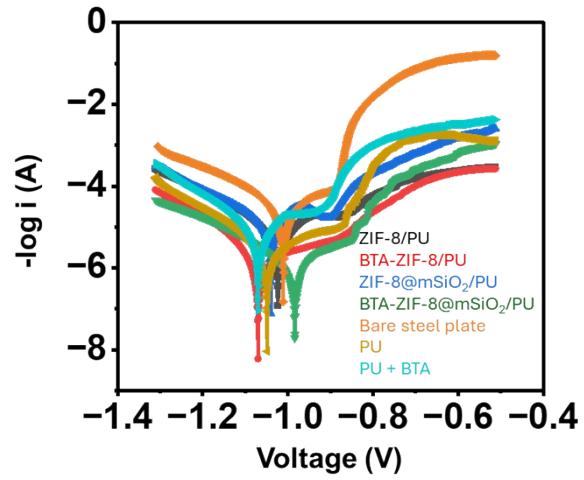

**Figure S18.** Potentiodynamic polarization measurements of the coatings with different compositions.

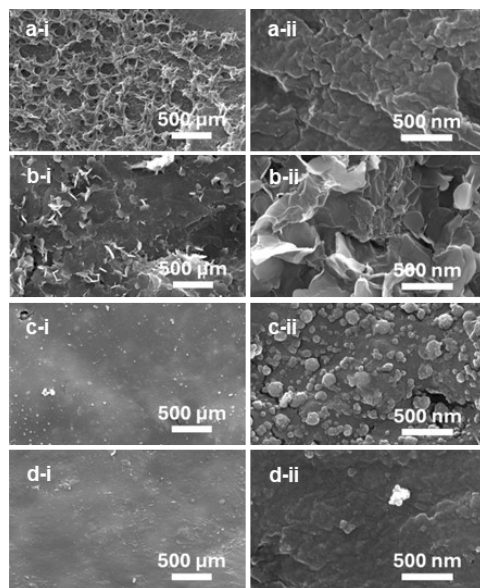

**Figure S19.** (i) Low- and (ii) high-magnification SEM images showing film morphology after EIS and potentiodynamic polarization tests for (a) ZIF-8/WPU, (b) BTA-ZIF-8/WPU, (c) ZIF-8@mSiO<sub>2</sub>/WPU, and (d) BTA-ZIF-8@mSiO<sub>2</sub>/WPU.

**Table S1.** Elemental distribution obtained from HR-TEM mapping of BTA-ZIF-8@mSiO<sub>2</sub>.

| <b>Element</b> | <b>Percentage (%)</b> |
|----------------|-----------------------|
| C              | 76.7                  |
| O              | 10.55                 |
| Si             | 7.52                  |
| Zn             | 3.92                  |
| N              | 0.76                  |
| Cl             | 0.28                  |
| Ca             | 0.26                  |

**Table S2.** XPS elemental analyses of ZIF-8@mSiO<sub>2</sub> (top) and BTA-ZIF-8@mSiO<sub>2</sub> (bottom).

| <b>Name</b> | <b>Position</b> | <b>At%</b> |
|-------------|-----------------|------------|
| O 1s        | 532.24          | 28.93      |
| C 1s        | 284.83          | 48.68      |
| N 1s        | 399.10          | 3.09       |
| Zn 2p       | 1021.78         | 1.01       |
| Si 2p       | 102.92          | 18.29      |

| <b>Name</b> | <b>Position</b> | <b>At%</b> |
|-------------|-----------------|------------|
| O 1s        | 533.10          | 39.43      |
| C 1s        | 285.10          | 28.90      |
| N 1s        | 400.24          | 6.17       |
| Zn 2p       | 1022.52         | 1.30       |
| Si 2p       | 103.73          | 24.20      |

**Table S3.** Zeta potential values for different ZIF-8-derived nanoparticles.

| <b>Sample</b>           | <b>ZIF-8</b> | <b>ZIF-8@mSiO<sub>2</sub></b> | <b>BTA-ZIF-8@mSiO<sub>2</sub></b> |
|-------------------------|--------------|-------------------------------|-----------------------------------|
| Values (mV)             | 17.85        | -23.61                        | -21.01                            |
|                         | 17.9         | -22.65                        | -26.78                            |
|                         | 18.94        | -22.1                         | -23.1                             |
| Mean value (mV)         | 18.23        | -22.79                        | -22.02                            |
| Standard deviation (mV) | 0.6          | 0.8                           | 3.0                               |

**Table S4.** Average thickness of WPU thin films incorporating 3 wt.% nanoparticles on steel plates, determined using an Elcometer.

| Sample                           | Thickness ( $\mu\text{m}$ ) |
|----------------------------------|-----------------------------|
| ZIF-8/WPU                        | 13.46                       |
| BTA-ZIF-8/WPU                    | 20.36                       |
| ZIF-8@mSiO <sub>2</sub> /WPU     | 22.00                       |
| BTA-ZIF-8@mSiO <sub>2</sub> /WPU | 17.83                       |

**Table S5.** Roughness parameters obtained from DSX1000 light optical microscopy images for different coatings.

| <b>Sample</b>                    | <b>R<sub>a</sub> (μm)</b> | <b>R<sub>q</sub> (μm)</b> |
|----------------------------------|---------------------------|---------------------------|
| ZIF-8/WPU                        | 0.290                     | 0.379                     |
| BTA-ZIF-8/WPU                    | 0.259                     | 0.357                     |
| ZIF-8@mSiO <sub>2</sub> /WPU     | 0.063                     | 0.083                     |
| BTA-ZIF-8@mSiO <sub>2</sub> /WPU | 0.087                     | 0.114                     |

**Table S6.** Equivalent circuit parameters used for coating data fitting.

| Film                             | Days | $R_s$<br>( $\Omega \cdot \text{cm}^2$ ) | $R_c$<br>( $\Omega \cdot \text{cm}^2$ ) | $Q_c$<br>( $\text{S s}^{n_1} \text{cm}^{-2}$ ) | $R_{ct}$<br>( $\Omega \cdot \text{cm}^2$ ) | $Q_{dl}$<br>( $\text{S s}^{n_2} \text{cm}^{-2}$ ) | W                     |
|----------------------------------|------|-----------------------------------------|-----------------------------------------|------------------------------------------------|--------------------------------------------|---------------------------------------------------|-----------------------|
| Bare steel plate                 | 0    | 3.064                                   | $4.29 \times 10^2$                      | $3.02 \times 10^{-4}$                          | $5.46 \times 10^1$                         | $1.74 \times 10^{-4}$                             |                       |
|                                  | 1    | 5.142                                   | $1.71 \times 10^2$                      | $1.80 \times 10^{-3}$                          | $9.90 \times 10^{-1}$                      | $1.06 \times 10^{-4}$                             | $5.01 \times 10^{-3}$ |
|                                  | 7    | 3.053                                   | $1.99 \times 10^2$                      | $8.30 \times 10^{-4}$                          | $1.83 \times 10^0$                         | $3.75 \times 10^{-5}$                             | $4.57 \times 10^{-3}$ |
|                                  | 14   | 5.331                                   | $4.79 \times 10^2$                      | $6.28 \times 10^{-4}$                          | $1.43 \times 10^1$                         | $8.20 \times 10^{-5}$                             | $5.34 \times 10^{-3}$ |
|                                  | 21   | 2.282                                   | $6.75 \times 10^2$                      | $6.43 \times 10^{-4}$                          | $1.01 \times 10^{-1}$                      | $2.35 \times 10^{-5}$                             | $3.63 \times 10^{-3}$ |
| WPU                              | 0    | 61.1                                    | $4.58 \times 10^3$                      | $6.66 \times 10^{-5}$                          | $8.47 \times 10^1$                         | $3.45 \times 10^{-7}$                             |                       |
|                                  | 1    | 49.73                                   | $2.74 \times 10^3$                      | $1.02 \times 10^{-4}$                          | $5.62 \times 10^1$                         | $1.92 \times 10^{-7}$                             | $8.26 \times 10^{-4}$ |
|                                  | 7    | 27.05                                   | $6.04 \times 10^3$                      | $1.19 \times 10^{-4}$                          | $1.42 \times 10^1$                         | $2.18 \times 10^{-7}$                             | $1.35 \times 10^{-3}$ |
|                                  | 14   | 31.09                                   | $4.99 \times 10^3$                      | $1.08 \times 10^{-4}$                          | $1.83 \times 10^1$                         | $2.92 \times 10^{-7}$                             | $1.78 \times 10^{-3}$ |
|                                  | 21   | 22.51                                   | $1.89 \times 10^3$                      | $1.76 \times 10^{-4}$                          | $2.83 \times 10^1$                         | $7.40 \times 10^{-7}$                             | $7.65 \times 10^{-4}$ |
| WPU + BTA                        | 0    | 41.17                                   | $3.73 \times 10^1$                      | $1.93 \times 10^{-7}$                          | $2.83 \times 10^3$                         | $4.92 \times 10^{-5}$                             |                       |
|                                  | 1    | 26.76                                   | $1.31 \times 10^3$                      | $8.85 \times 10^{-5}$                          | $8.72 \times 10^0$                         | $1.51 \times 10^{-5}$                             | $4.71 \times 10^{-3}$ |
|                                  | 7    | 13.46                                   | $4.15 \times 10^3$                      | $5.96 \times 10^{-5}$                          | $8.56 \times 10^0$                         | $8.12 \times 10^{-8}$                             | $1.95 \times 10^{-3}$ |
|                                  | 14   | 24.41                                   | $1.98 \times 10^3$                      | $5.11 \times 10^{-5}$                          | $7.12 \times 10^0$                         | $4.73 \times 10^{-7}$                             | $1.12 \times 10^{-3}$ |
|                                  | 21   | 24.24                                   | $4.22 \times 10^2$                      | $4.71 \times 10^{-3}$                          | $3.16 \times 10^1$                         | $3.38 \times 10^{-7}$                             | $6.74 \times 10^{-4}$ |
| ZIF-8/WPU                        | 0    | 346.9                                   | $1.03 \times 10^3$                      | $3.41 \times 10^{-8}$                          | $1.04 \times 10^4$                         | $4.21 \times 10^{-5}$                             |                       |
|                                  | 1    | 123.5                                   | $2.52 \times 10^3$                      | $1.01 \times 10^{-4}$                          | $2.50 \times 10^2$                         | $5.48 \times 10^{-8}$                             | $9.55 \times 10^{-4}$ |
|                                  | 7    | 64.66                                   | $1.61 \times 10^3$                      | $1.85 \times 10^{-4}$                          | $7.64 \times 10^1$                         | $1.57 \times 10^{-7}$                             | $1.31 \times 10^{-3}$ |
|                                  | 14   | 51.37                                   | $2.26 \times 10^3$                      | $3.27 \times 10^{-4}$                          | $8.84 \times 10^1$                         | $2.42 \times 10^{-7}$                             | $7.81 \times 10^{-4}$ |
|                                  | 21   | 44.67                                   | $2.54 \times 10^3$                      | $3.76 \times 10^{-4}$                          | $1.47 \times 10^2$                         | $2.41 \times 10^{-7}$                             | $5.59 \times 10^{-4}$ |
| BTA-ZIF-8/WPU                    | 0    | 557.2                                   | $3.56 \times 10^3$                      | $2.58 \times 10^{-8}$                          | $3.50 \times 10^4$                         | $5.48 \times 10^{-5}$                             |                       |
|                                  | 1    | 133.8                                   | $2.26 \times 10^3$                      | $8.25 \times 10^{-5}$                          | $3.27 \times 10^2$                         | $6.10 \times 10^{-8}$                             | $1.32 \times 10^{-3}$ |
|                                  | 7    | 86.55                                   | $2.91 \times 10^3$                      | $2.36 \times 10^{-4}$                          | $1.67 \times 10^2$                         | $8.99 \times 10^{-8}$                             | $5.70 \times 10^{-4}$ |
|                                  | 14   | 85.14                                   | $7.23 \times 10^3$                      | $3.00 \times 10^{-4}$                          | $1.80 \times 10^2$                         | $1.05 \times 10^{-7}$                             | $4.40 \times 10^{-4}$ |
|                                  | 21   | 75.29                                   | $7.30 \times 10^3$                      | $4.96 \times 10^{-4}$                          | $2.22 \times 10^2$                         | $9.61 \times 10^{-8}$                             | $2.66 \times 10^{-4}$ |
| ZIF-8@mSiO <sub>2</sub> /WPU     | 0    | 285.7                                   | $1.54 \times 10^4$                      | $5.62 \times 10^{-5}$                          | $3.14 \times 10^3$                         | $9.92 \times 10^{-9}$                             | $1.11 \times 10^{-3}$ |
|                                  | 1    | 147.5                                   | $1.83 \times 10^4$                      | $1.00 \times 10^{-4}$                          | $5.43 \times 10^2$                         | $1.58 \times 10^{-8}$                             | $4.44 \times 10^{-4}$ |
|                                  | 7    | 57.05                                   | $5.64 \times 10^3$                      | $5.95 \times 10^{-5}$                          | $7.61 \times 10^1$                         | $4.49 \times 10^{-8}$                             | $1.17 \times 10^{-3}$ |
|                                  | 14   | 39.52                                   | $2.13 \times 10^3$                      | $4.68 \times 10^{-5}$                          | $4.07 \times 10^1$                         | $4.95 \times 10^{-7}$                             | $1.59 \times 10^{-3}$ |
|                                  | 21   | 30.09                                   | $1.75 \times 10^3$                      | $9.73 \times 10^{-5}$                          | $7.24 \times 10^1$                         | $3.45 \times 10^{-7}$                             | $8.86 \times 10^{-4}$ |
| BTA-ZIF-8@mSiO <sub>2</sub> /WPU | 0    | 413.9                                   | $4.40 \times 10^4$                      | $8.10 \times 10^{-5}$                          | $3.80 \times 10^3$                         | $4.21 \times 10^{-8}$                             |                       |
|                                  | 1    | 112.3                                   | $1.50 \times 10^4$                      | $1.01 \times 10^{-4}$                          | $6.64 \times 10^2$                         | $4.11 \times 10^{-8}$                             | $6.72 \times 10^{-4}$ |
|                                  | 7    | 58.51                                   | $9.60 \times 10^4$                      | $8.93 \times 10^{-5}$                          | $1.44 \times 10^2$                         | $5.15 \times 10^{-8}$                             | $7.98 \times 10^{-4}$ |
|                                  | 14   | 62.32                                   | $2.00 \times 10^4$                      | $8.86 \times 10^{-5}$                          | $1.28 \times 10^2$                         | $7.14 \times 10^{-8}$                             | $1.24 \times 10^{-4}$ |
|                                  | 21   | 53.56                                   | $1.93 \times 10^4$                      | $8.39 \times 10^{-5}$                          | $1.10 \times 10^2$                         | $6.57 \times 10^{-8}$                             | $5.25 \times 10^{-4}$ |

**Table S7.** Electrochemical parameters obtained from potentiodynamic polarization measurements of the coatings after 3 weeks of immersion testing.

| Sample                           | $E_{\text{corr}}$ (V) | $i_{\text{corr}}$ (A cm <sup>-2</sup> ) | $\beta_c$ (mV dec <sup>-1</sup> ) | $\beta_a$ (mV dec <sup>-1</sup> ) |
|----------------------------------|-----------------------|-----------------------------------------|-----------------------------------|-----------------------------------|
| Bare steel plate                 | -1.10                 | $4.19 \times 10^{-5}$                   | 165.84                            | 61.4                              |
| WPU                              | -1.05                 | $3.67 \times 10^{-6}$                   | 141.84                            | 103.2                             |
| WPU + BTA                        | -1.07                 | $1.41 \times 10^{-5}$                   | 135.50                            | 118.6                             |
| ZIF-8/WPU                        | -1.02                 | $6.70 \times 10^{-6}$                   | 149.25                            | 256.1                             |
| BTA-ZIF-8/WPU                    | -1.07                 | $1.51 \times 10^{-6}$                   | 130.55                            | 185.3                             |
| ZIF-8@mSiO <sub>2</sub> /WPU     | -1.04                 | $8.26 \times 10^{-6}$                   | 131.58                            | 212.0                             |
| BTA-ZIF-8@mSiO <sub>2</sub> /WPU | -0.98                 | $9.90 \times 10^{-7}$                   | 145.56                            | 113.9                             |
